# Supplementary material
Source: PubMed Central journal article supplement (PMC3683720)
Supplement: 1220015110_pnas.201220015SI.pdf [file 1220015110_pnas.201220015SI.pdf]

# Supporting Information

Liebrand et al. 10.1073/pnas.1220015110

## SI Materials and Methods

**Plant Growth Conditions.** *Nicotiana benthamiana*, *N. benthamiana*: Cf-4 (1), and *Nicotiana tabacum* were grown under 16 h of light at 25 °C and 8 h of darkness at 21 °C in climate chambers with a relative humidity of ~75%. *Arabidopsis*, tomato (*Solanum lycopersicum*) cultivar (cv.) Money Maker (MM) and cv. Motelle, as well as Cf.2.2- (2) and Cf-4 (*Hcr9-4D*)-transgenic MM plants (3) were grown in the greenhouse under 16 h of light at 21 °C and 8 h of darkness at 19 °C. The relative humidity in the greenhouse was ~75%.

**Plant Transformations.** Plasmid pBIN-KS-35S::Cf-4-eGFP (Sol 2701) (4) was used for transformation of tomato MM-Cf-0, which does not carry a functional Cf-4 gene. Transformations were performed as described (5). By using a quantitative RT-PCR (qRT-PCR)-based method (6), plants carrying only single- or two-copy transgenes were selected. To test for the presence of functional Cf-4, leaflets of transgenic tomato plants were infiltrated with apoplastic fluid from leaflets of a MM-Cf-0 plant colonized by an Avr4-secreting strain of *Cladosporium fulvum* by using a syringe without needle. *Arabidopsis* mutant Columbia 0 (Col-0) *suppressor of bir1-1 (sobir1)* (7) was transformed with p35S::Ve1 as described (8). Four homozygous single insert lines expressing Ve1 were selected based on segregation and qRT-PCR analysis and used in *Verticillium dahliae* disease assays.

**Binary Vectors for *Agrobacterium tumefaciens*-Mediated Transient Transformation.** Sequences of primers and corresponding targets can be found in Table S4. Construction of plasmids containing Cf-2.2, -4, -4E, -9, Peru2, and Ve1, C-terminally fused to either eGFP or the Myc epitope-tag, has been described (4, 9). *S. lycopersicum* Flagellin Sensing 2 (*SIFLS2*)-GFP was expressed from pCAMBIA2300-FLS2p::SIFLS2-GFP (10). For novel constructs, coding regions were amplified from cDNA. PCR fragment *S. lycopersicum* Somatic Embryogenesis Receptor Kinase 3a (*SISERK3a*)/*BAK1* was cloned in pDONR201 by using Gateway BP Clonase II (Invitrogen). Fragments *SISERK1*, *SIEIX2*, *SISOBIR1*, *SISOBIR1-like*, and *Arabidopsis thaliana* (*At*)*SOBIR1* were cloned in pENTR/D-Topo (Invitrogen). Plasmid pENTR/D-Topo containing *A. thaliana* Clavata1 (*AtCLV1*) has been described (11). To generate mutations in the *SOBIR1* kinase domain, pENTR/D-Topo vectors containing *SISOBIR1*, *SISOBIR1-like*, and *AtSOBIR1* coding regions were PCR-amplified with primers introducing a mismatch nucleotide to generate a D to N codon change. After amplification, the methylated parental plasmid was digested by using DpnI. All pDONR201 and pENTR/D-Topo clones were sequenced, and subsequently fragments were transferred to the binary transformation vector pBIN-KS-35S::GWY-eGFP (Sol 2095; for C-terminally tagging with eGFP) or pGWB20 (12) (for C-terminally tagging with the Myc epitope), by using Gateway LR Clonase II (Invitrogen). This process resulted in plasmids pBIN-KS-35S::At-CLV1-eGFP (Sol 2824), pBIN-KS-35S::SI-CLV2-eGFP (Sol 2782), pBIN-KS-35S::SI-EIX2-eGFP (Sol 2863), pBIN-KS-35S::SI-Suppressor of Non-expressor of pathogenesis-related genes 1-1 (*Npr1-1*), Constitutive 2 (*SNC2*)-eGFP (Sol 3109), pBIN-KS-35S::SI-Too Many Mouths (*TMM*)-eGFP (Sol 3110), pBIN-KS-35S::SI-*SOBIR1*-eGFP (Sol 2774), pGWB20-SI-*SOBIR1*-Myc (Sol 2754), pGWB20-SI-*SOBIR1-like*-Myc (Sol 2752), pGWB20-*AtSOBIR1*-Myc (Sol 2849), pGWB20-SI-*SOBIR1D473N*-Myc (Sol 2878), pGWB20-SI-*SOBIR1-likeD486N*-Myc (Sol 2879), and pGWB20-*AtSOBIR1D489N*-Myc (Sol 2880). Avr4 was expressed from pMOG800-Avr4 and

Avr9 from pMOG800-Avr9 (13). GFP-HA was expressed from pBIN61-GFP-HA (14). All binary plasmids were transformed to *A. tumefaciens* strain C58C1, carrying helper plasmid pCH32. Infiltration of *Agrobacterium* into plant leaves (agroinfiltration) was performed as described at OD<sub>600</sub> = 1, unless indicated otherwise (13).

**Protein Identification by Immunopurification, Followed by Tryptic Digest and Mass Spectrometry.** Immunopurifications from tomato and *N. benthamiana* were essentially performed following the described protocol with minor modifications (4). For immunopurifications from the transgenic tomato lines expressing Cf-4-eGFP, young, not fully expanded leaves of 6-wk-old plants were taken. Proteins were extracted by using extraction buffer [EB; 150 mM NaCl, 1% IGEPAL CA-630 (Nonidet P-40), 50 mM Tris, pH 8, plus one tablet of protease inhibitor mixture (Roche) per 50 mL of EB]. To 1 g of leaf material (fresh weight), 2 mL of EB was added. Subsequently, a total protein extract of 10 mL was subjected to immunopurification by adding 60  $\mu$ L (50% slurry) of GFP\_TrpA beads (Chromotek) and incubation while shaking for 1 h (4). Beads were then washed five times with EB. Tryptic on-bead digestion was followed by mass spectrometry by using either the Synapt MS (Waters) or the Orbitrap XL (Thermo Scientific) (4).

**Coimmunopurifications and Immunoblotting.** Coimmunopurifications were performed as described (4). Two milliliters of protein extract was incubated for 1 h with 15  $\mu$ L of GFP\_TrpA beads (50% slurry), and beads were washed five times with EB. Protein blots were developed by using either  $\alpha$ -GFP-HRP (130-091-833; MACS Antibodies) or  $\alpha$ -cMyc (cMyc 9E10, sc-40; Santa Cruz) with  $\alpha$ -mouse-HRP (Amersham) as a secondary antibody.

**Confocal Microscopy.** Confocal microscopy was performed on agroinfiltrated *N. benthamiana* leaves as described (4).

**Generation of Virus-Induced Gene Silencing Constructs.** Fragments to be used for virus-induced gene silencing (VIGS) were PCR amplified from *N. benthamiana* or tomato cDNA (Table S4). All fragments were cloned into pCR4-TOPO (Invitrogen) and sequenced. The tomato fragments were then excised from pCR4-TOPO by using restriction enzymes XbaI and BamHI and cloned into pTRV2:RNA2 (pYL156) (15) that was linearized with the same enzymes, to generate pTRV2:*SISOBIR1* (Sol 2756), pTRV2:*SISOBIR1-like* (Sol 2755), and pTRV2:*SISOBIR1/SISOBIR1-like* (Sol 2779). Fragment *NbSOBIR1* was excised from pCR4-TOPO by using enzymes EcoRI and BamHI and cloned into pTRV2:RNA2, linearized with the same enzymes, to generate pTRV2:*NbSOBIR1* (Sol 2850). VIGS fragment *NbSOBIR1-like* was excised from pCR4-TOPO by using BamHI and XhoI and cloned into pTRV2:RNA2, linearized with the same enzymes, to generate pTRV2:*NbSOBIR1-like* (Sol 2851). Fragment *NbSOBIR1-like* was also cloned into Sol 2850, linearized with BamHI and XhoI, to generate pTRV2:*NbSOBIR1/NbSOBIR1-like* (Sol 2854).

**VIGS in *N. benthamiana* and Tobacco and Hypersensitive Response Assays.** VIGS experiments in *N. benthamiana*:Cf-4, wild-type *N. benthamiana*, and *N. tabacum* cv. Samsun were performed as described (4, 9). In brief, 4-wk-old plants were inoculated by agroinfiltration with pTRV:RNA1 and pTRV:RNA2 (15). TRV:Cf-4 (16), TRV:Enhanced Disease Susceptibility 1 (*EDS1*) (9), TRV: $\beta$ -glucuronidase (*GUS*) (17), TRV:GFP (18), and TRV:*Phytoene desaturase* (*PDS*) (15) were included as controls.

For hypersensitive response (HR) assays, 3 wk after virus inoculations, mature leaves were agroinfiltrated to individually express Avr4 at OD<sub>600</sub> = 0.03 (1), RxD460V [pB1-Rx (AT39-H1; D460V)] (19) at OD<sub>600</sub> = 0.1, Bcl2-Associated protein X (BAX) (20) at OD<sub>600</sub> = 0.5, and Peru2-eGFP at OD<sub>600</sub> = 1. For complementation analysis with *ArSOBIR1*-Myc and the respective D489N kinase mutant, constructs driving expression of these proteins, in addition to GUS, were coexpressed with Avr4 (OD<sub>600</sub> = 0.03) at an OD<sub>600</sub> of 0.5, in *N. benthamiana*:*Cf-4*. In tobacco, Ve1 (pMOG800-Ve1) (6) and Ave1 (pFAST-Ave1) (9) were transiently coexpressed in leaf sections at an OD<sub>600</sub> of 2 for each construct. Three days after agroinfiltration, leaves were examined for development of an HR.

**RNA Extraction, cDNA Synthesis, and qRT-PCR Analysis.** For qRT-PCRs, RNA was isolated from *N. benthamiana* inoculated with the various TRV constructs. For RT-PCRs, mature leaves of TRV-inoculated plants were either agroinfiltrated with *Cf-4*-eGFP or *Ve1*-eGFP, or they were not transiently transformed. RNA extraction, cDNA synthesis, and qRT-PCR were performed as described (4). For RT-PCR analysis, the amount of cycles is indicated. The primer combinations used can be found in Table S4.

- Gabriëls SHEJ, et al. (2007) An NB-LRR protein required for HR signalling mediated by both extra- and intracellular resistance proteins. *Plant J* 50(1):14–28.
- Dixon MS, et al. (1996) The tomato *Cf-2* disease resistance locus comprises two functional genes encoding leucine-rich repeat proteins. *Cell* 84(3):451–459.
- Thomas CM, et al. (1997) Characterization of the tomato *Cf-4* gene for resistance to *Cladosporium fulvum* identifies sequences that determine recognition specificity in *Cf-4* and *Cf-9*. *Plant Cell* 9(12):2209–2224.
- Liebrand TWH, et al. (2012) Endoplasmic reticulum-quality control chaperones facilitate the biogenesis of Cf receptor-like proteins involved in pathogen resistance of tomato. *Plant Physiol* 159(4):1819–1833.
- van Esse HP, et al. (2008) The *Cladosporium fulvum* virulence protein Avr2 inhibits host proteases required for basal defense. *Plant Cell* 20(7):1948–1963.
- Fradin EF, et al. (2009) Genetic dissection of *Verticillium* wilt resistance mediated by tomato *Ve1*. *Plant Physiol* 150(1):320–332.
- Gao M, et al. (2009) Regulation of cell death and innate immunity by two receptor-like kinases in *Arabidopsis*. *Cell Host Microbe* 6(1):34–44.
- Fradin EF, et al. (2011) Interfamily transfer of tomato *Ve1* mediates *Verticillium* resistance in *Arabidopsis*. *Plant Physiol* 156(4):2255–2265.
- Zhang Z, et al. (2013) Optimized agroinfiltration and virus-induced gene silencing to study *Ve1*-mediated *Verticillium* resistance in tobacco. *Mol Plant Microbe Interact* 26(2):182–190.
- Robatzek S, et al. (2007) Molecular identification and characterization of the tomato flagellin receptor LeFLS2, an orthologue of *Arabidopsis* FLS2 exhibiting characteristically different perception specificities. *Plant Mol Biol* 64(5):539–547.
- Frei dit Frey N, et al. (2012) Plasma membrane calcium ATPases are important components of receptor-mediated signaling in plant immune responses and development. *Plant Physiol* 159(2):798–809.
- Nakagawa T, et al. (2007) Development of series of gateway binary vectors, pGWBs, for realizing efficient construction of fusion genes for plant transformation. *J Biosci Bioeng* 104(1):34–41.

**VIGS in Tomato and *C. fulvum* and *V. dahliae* Disease Assays.** Tomato was subjected to VIGS as described (4). For *C. fulvum* disease assays, tomato plants transformed with the *Hcr9-4D* (*Cf-4*) or *Cf-2.2* gene and fully resistant to a race 5 strain of *C. fulvum* (secreting both Avr4 and Avr2), were subjected to agroinoculation with various recombinant TRV VIGS constructs targeting *SISOBIR1* (-like), *Cf-4*, or *GUS*. Nonagroinoculated MM-Cf-0 plants served as fully susceptible controls. For *V. dahliae* disease assays, tomato cultivar Motelle carrying the *Ve1* gene and resistant to *V. dahliae* race 1 strains expressing Ave1, was used. TRV:*Ve1* and TRV:*GFP* were used as controls. Four to six tomato plants were used per treatment in each experiment. Leaf canopy area measurements were performed as described (21), and for each plant the canopy area was calculated. The average canopy area of *V. dahliae*-inoculated plants, compared with control plants, was calculated for three independent biological repeats.

*C. fulvum* inoculations were performed as described (4). *C. fulvum* race 5-pGPD:*GUS*, constitutively expressing the *GUS* reporter gene, was used for inoculations (22). *V. dahliae* disease assays on tomato *Arabidopsis*, as well as quantification of *V. dahliae* biomass by qRT-PCRs, were performed as described (6, 8). *V. dahliae* race 1 strain JR2, expressing Ave1, was used in the various disease assays.

- Van der Hoorn RAL, Laurent F, Roth R, De Wit PJGM (2000) Agroinfiltration is a versatile tool that facilitates comparative analyses of *Avr9/Cf-9*-induced and *Avr4/Cf-4*-induced necrosis. *Mol Plant Microbe Interact* 13(4):439–446.
- Sacco MA, Mansoor S, Moffett P (2007) A RanGAP protein physically interacts with the NB-LRR protein Rx, and is required for Rx-mediated viral resistance. *Plant J* 52(1):82–93.
- Liu Y, Schiff M, Marathe R, Dinesh-Kumar SP (2002) Tobacco *Rar1*, *EDS1* and *NPR1/NIM1* like genes are required for N-mediated resistance to tobacco mosaic virus. *Plant J* 30(4):415–429.
- Gabriëls SHEJ, et al. (2006) CDNA-AFLP combined with functional analysis reveals novel genes involved in the hypersensitive response. *Mol Plant Microbe Interact* 19(6):567–576.
- Tameling WIL, Baulcombe DC (2007) Physical association of the NB-LRR resistance protein Rx with a Ran GTPase-activating protein is required for extreme resistance to *Potato virus X*. *Plant Cell* 19(5):1682–1694.
- Burch-Smith TM, Schiff M, Liu Y, Dinesh-Kumar SP (2006) Efficient virus-induced gene silencing in *Arabidopsis*. *Plant Physiol* 142(1):21–27.
- Bendahmane A, Farnham G, Moffett P, Baulcombe DC (2002) Constitutive gain-of-function mutants in a nucleotide binding site-leucine rich repeat protein encoded at the *Rx* locus of potato. *Plant J* 32(2):195–204.
- Lacomme C, Santa Cruz S (1999) Bax-induced cell death in tobacco is similar to the hypersensitive response. *Proc Natl Acad Sci USA* 96(14):7956–7961.
- Santhanam P, Thomma BPHJ (2013) *Verticillium dahliae* Sge1 differentially regulates expression of candidate effector genes. *Mol Plant Microbe Interact* 26(2):249–256.
- Stulemeijer IJE, Stratmann JW, Joosten MHJ (2007) Tomato mitogen-activated protein kinases LeMPK1, LeMPK2, and LeMPK3 are activated during the *Cf-4/Avr4*-induced hypersensitive response and have distinct phosphorylation specificities. *Plant Physiol* 144(3):1481–1494.

**Table S1. Sequences and ProteinLynx scores of peptides specifically matching Solyc06g071810.1.1, Solyc03g111800.2.1, and Cf-4-eGFP, of a tryptic digest of Cf-4-eGFP immunopurified from transgenic tomato line TL3**

| Protein name  | Peptide sequence              | ProteinLynx score |
|---------------|-------------------------------|-------------------|
| S/SOBIR1      | DLKPANILLDDDMEAR              | 40.9              |
| S/SOBIR1      | EDGVASLEMIGK                  | 62.3              |
| S/SOBIR1      | IIQSPMDAAEITTEEDTK            | 53.5              |
| S/SOBIR1      | KAEDLAFLEK                    | 78.9              |
| S/SOBIR1      | VADFGLAK                      | 62.2              |
| S/SOBIR1-like | DAAELTEEDSK                   | 65.1              |
| S/SOBIR1-like | DLKPGNVLLDDDMEAR              | 57.0              |
| S/SOBIR1-like | IADFGLAK                      | 66.7              |
| S/SOBIR1-like | NDPGLTIFSPLIK                 | 42.7              |
| S/SOBIR1-like | NVMTSEDPNR                    | 50.9              |
| Cf-4-eGFP     | EIDESTGFPEYISDPYDIYYNYLTTISTK | 28.7              |
| Cf-4-eGFP     | FEFHIPSIIIGDLVGLR             | 39.8              |
| Cf-4-eGFP     | FGEFSDLTHLDSLHSSFR            | 74.3              |
| Cf-4-eGFP     | GPIPNSSLNPK                   | 60.3              |
| Cf-4-eGFP     | ILDSNMIINLSK                  | 78.3              |
| Cf-4-eGFP     | ILGNLQTMK                     | 64.7              |
| Cf-4-eGFP     | ISLNEELTFGPHNFELLLK           | 59.0              |
| Cf-4-eGFP     | LDLSYNDFTGSPISPK              | 52.7              |
| Cf-4-eGFP     | LYLYNVNIDDR                   | 55.6              |
| Cf-4-eGFP     | NEYLSHLDSLNNR                 | 65.3              |
| Cf-4-eGFP     | SSGNTNLFMGLQILDLSNNGFSGNLPK   | 30.9              |

S/SOBIR1, Solyc06g071810.1.1; S/SOBIR1-like, Solyc03g111800.2.1. Scores were identified by mass spectrometry using the Synapt MS.

**Table S2. Sequences, ProteinLynx, and Mascot ion scores of peptides specifically matching *NbSOBIR1* or matching both *NbSOBIR1* and *NbSOBIR1*-like, of a tryptic digest of immunopurified Cf-4-eGFP transiently expressed in *N. benthamiana***

| Protein name*                | Peptide sequence                | Mascot ion score <sup>†</sup> | ProteinLynx score <sup>‡</sup> |
|------------------------------|---------------------------------|-------------------------------|--------------------------------|
| <i>NbSOBIR1/SOBIR1</i> -like | ASMPAPAPAFVNR                   |                               | 29.3                           |
| <i>NbSOBIR1/SOBIR1</i> -like | DGSLQDILQQVTEGTR                |                               | 32.3                           |
| <i>NbSOBIR1/SOBIR1</i> -like | ELDWLGR                         |                               | 59.0                           |
| <i>NbSOBIR1/SOBIR1</i> -like | LNLYPPDHAALLLVQK                |                               | 33.3                           |
| <i>NbSOBIR1/SOBIR1</i> -like | LSLADNMFTGK                     |                               | 69.8                           |
| <i>NbSOBIR1/SOBIR1</i> -like | NGSLQDILQQVTEGTQ                |                               | 48.4                           |
| <i>NbSOBIR1/SOBIR1</i> -like | NGSLQDILQQVTEGTR                |                               | 78.5                           |
| <i>NbSOBIR1/SOBIR1</i> -like | NHTQRI                          |                               | 45.5                           |
| <i>NbSOBIR1/SOBIR1</i> -like | NLEKLSLADN                      |                               | 31.6                           |
| <i>NbSOBIR1/SOBIR1</i> -like | YFPNLEK                         |                               | 56.4                           |
| <i>NbSOBIR1</i>              | LNLYPPDHAALLLVQK                | 50.8                          |                                |
| <i>NbSOBIR1</i>              | KLEILDGNNLFSGK                  | 59.4                          |                                |
| <i>NbSOBIR1</i>              | SEIQILGQIR                      | 68                            |                                |
| <i>NbSOBIR1</i>              | NGSLQDILQQVTEGTR                | 100.5                         |                                |
| <i>NbSOBIR1</i>              | DLKPANVLLDDDMEAR                | 96.4                          |                                |
| <i>NbSOBIR1</i>              | LPSDEFFQHTPEMSLVK               | 98.3                          |                                |
| <i>NbSOBIR1</i>              | NVMTSEDPK                       | 74.7                          |                                |
| <i>NbSOBIR1/SOBIR1</i> -like | LIGSGFEEQMLLVK                  | 62.4                          |                                |
| <i>NbSOBIR1</i>              | IACFCTLENPK                     | 74.7                          |                                |
| <i>NbSOBIR1</i>              | DLGIQGQR                        | 38                            |                                |
| <i>NbSOBIR1/SOBIR1</i> -like | SNGLSGTLSPAIGK                  | 82.7                          |                                |
| <i>NbSOBIR1</i>              | ILDLSNELSGNINFLK                | 96                            |                                |
| <i>NbSOBIR1</i>              | GKTDGSLTIYSPLIK                 | 108.6                         |                                |
| <i>NbSOBIR1</i>              | GGCGEVYRAELPGSNGK               | 49.9                          |                                |
| <i>NbSOBIR1/SOBIR1</i> -like | KILQPPMDAAELAEEDTKALNK          | 61.2                          |                                |
| <i>NbSOBIR1/SOBIR1</i> -like | AVDPDAHTHVTTSNVAGTVGYIAPEYHQTLK | 50.2                          |                                |

Scores were identified by mass spectrometry of a tryptic digest of immunopurified Cf-4-eGFP.

\*For identifications with ProteinLynx, peptides were matched on the translated tomato genome sequence. Because of the difference in sequence between *S/SOBIR1* and *NbSOBIR1* homologs, no distinction between *NbSOBIR1* and *NbSOBIR1*-like can be made. Mascot identifications were based on translated tobacco EST sequences, and peptides can match either *NbSOBIR1* or *NbSOBIR1*-like. When specifically matching to the corresponding *N. benthamiana* homolog, the protein name is indicated. When no distinction can be made, *NbSOBIR1/SOBIR1*-like is indicated.

<sup>†</sup>Mascot ion scores are presented for the peptides that were identified on the Orbitrap XL.

<sup>‡</sup>ProteinLynx peptide ladder scores are presented for the peptides that were identified on the Synapt MS.

**Table S3. Sequences and Mascot ion scores of peptides specifically matching *NbSOBIR1*, *NbSOBIR1*-like or both, and *Ve1-eGFP*, of a tryptic digest of immunopurified *Ve1-eGFP* transiently expressed in *N. benthamiana***

| Protein name*                | Peptide sequence               | Mascot ion score |
|------------------------------|--------------------------------|------------------|
| <i>NbSOBIR1</i> -like        | ILDLSSNELSGLNFLK               | 83.6             |
| <i>NbSOBIR1</i>              | KLEILDGNNLFSGK                 | 76.2             |
| <i>NbSOBIR1</i>              | GKTDGSLTIYSPLIK                | 109.2            |
| <i>NbSOBIR1/SOBIR1</i> -like | ILQPPMDAAELAEEDTK              | 62.8             |
| <i>NbSOBIR1</i>              | DLKPANVLLDDMEAR                | 82.7             |
| <i>NbSOBIR1</i>              | AVPDAHTHVTTSNVAGTVGYIAPEYHQTLK | 45.9             |
| <i>NbSOBIR1</i>              | NVMTSEDPKR                     | 45.9             |
| <i>NbSOBIR1</i>              | LPSDEFFQHTPEMSLVK              | 46.9             |
| <i>NbSOBIR1</i>              | LSLADNMFTGK                    | 83.8             |
| <i>NbSOBIR1</i>              | SNGLSGTLPATGK                  | 49.8             |
| <i>NbSOBIR1</i>              | TDGSLTIYSPLIK                  | 74               |
| <i>Ve1-eGFP</i>              | SLLLQFKGSLQYDSTLSKK            | 35.7             |
| <i>Ve1-eGFP</i>              | YLNLSNAGFVGGIPITLSR            | 65               |
| <i>Ve1-eGFP</i>              | LVTLDLSTILPFFDQPLK             | 58.7             |
| <i>Ve1-eGFP</i>              | DCQISGPLDESLSK                 | 55.5             |
| <i>Ve1-eGFP</i>              | GSIPIFFR                       | 38.2             |
| <i>Ve1-eGFP</i>              | LELSNCFYGSIPSTMANLR            | 113.3            |
| <i>Ve1-eGFP</i>              | KLTYLDLSRN                     | 47.9             |
| <i>Ve1-eGFP</i>              | RNQFVGQVD                      | 62               |
| <i>Ve1-eGFP</i>              | VLSLSSNFFR                     | 63               |
| <i>Ve1-eGFP</i>              | LGVLNLGNNK                     | 63.4             |
| <i>Ve1-eGFP</i>              | LLEVLNVGNRR                    | 75.1             |
| <i>Ve1-eGFP</i>              | SNLVVLDLHSNR                   | 88.6             |
| <i>Ve1-eGFP</i>              | SIVNCKLLEVLNVGNRR              | 77.4             |
| <i>Ve1-eGFP</i>              | GMMVADDYVETGR                  | 81.1             |
| <i>Ve1-eGFP</i>              | LYYQDTVTLTIK                   | 75.6             |
| <i>Ve1-eGFP</i>              | VFTSIDFSSNR                    | 73.2             |
| <i>Ve1-eGFP</i>              | GEELFTGVVPIVVELDGDVNGHK        | 78.7             |
| <i>Ve1-eGFP</i>              | FSVGEGEGDATYGKLTLLK            | 42.8             |
| <i>Ve1-eGFP</i>              | MPEGYVQER                      | 601.1            |
| <i>Ve1-eGFP</i>              | YPDHMKQHDFFK                   | 54.1             |

Scores were identified by mass spectrometry using the Orbitrap XL.

\*Peptides were identified based on translated tobacco EST sequences and can match either *NbSOBIR1* or *NbSOBIR1*-like. When specifically matching to the corresponding *N. benthamiana* homolog, the protein name is indicated. When no distinction can be made, *NbSOBIR1/SOBIR1*-like is indicated.

**Table S4. Sequences of oligonucleotide primers used in this study**

| Primer code | Sequence, 5'–3'                                             | Target sequence                             |
|-------------|-------------------------------------------------------------|---------------------------------------------|
| Ro1         | CACCATGGCTCCATTGTCTCTC                                      | <i>SISNC2</i>                               |
| Ro2         | TTTACAACATTTGGACAATAAAAC                                    | <i>SISNC2</i>                               |
| Ro6         | CACCATGGCCCTTTTCTCTCAATA                                    | <i>SITMM</i>                                |
| Ro7         | CAACAGACAAC TAGAACA AAAA                                    | <i>SITMM</i>                                |
| to11        | GGGGACCAC TTTGTACAAGAAAGCTGGGTTATATCTTTTCTGTGCTTTTTCATTTTC  | <i>AttB1–Cf-4</i> RT-PCR                    |
| to12        | GGGGACAAG TTTGTACA AAAAAGCAGGCTTATGATGATGGTTCTAGAAAAGTAGT   | <i>AttB2–Cf-4</i> RT-PCR                    |
| to118       | CACCATGAAAATGATGGCAAC                                       | <i>Ve1</i> RT-PCR                           |
| to119       | CTTCTTGAAAACCAAAGCAAG                                       | <i>Ve1</i> RT-PCR                           |
| to156       | ATGCTTGATCTGAGTTAACA                                        | <i>SISOBIR1</i>                             |
| to157       | CACCATGACTTCGAATATC                                         | <i>SISOBIR1</i>                             |
| to164       | CACCATGACCTTCACAGCCTC                                       | <i>SISOBIR1-like</i>                        |
| to165       | ATGCTTGATCTGCATCAACATGC                                     | <i>SISOBIR1-like</i>                        |
| to166       | ATCTAGATTCTGTAAGAAGAGG                                      | VIGS fragment <i>SISOBIR1</i>               |
| to167       | AGGATCCGAATTTCTGATTTAAC                                     | VIGS fragment <i>SISOBIR1</i>               |
| to168       | ATCTAGAGAACGCAACAAGGC                                       | VIGS fragment <i>SISOBIR1-like</i>          |
| to169       | AGGATCCAGAGGACGGAGAAG                                       | VIGS fragment <i>SISOBIR1-like</i>          |
| to178       | ATCTAGAATCAGACACTGAAGTTTAC                                  | VIGS fragment <i>SISOBIR1/SISOBIR1-like</i> |
| to179       | AGGATCCATCTTGAGAACCAAAAG                                    | VIGS fragment <i>SISOBIR1/SISOBIR1-like</i> |
| to180       | CACCATGGCAGAATCACTTGTGAAC                                   | <i>SICLV2</i>                               |
| to181       | ACCTGCTAAATTTTTTGTGTTGC                                     | <i>SICLV2</i>                               |
| to239       | CACCATGGCTGTTCCCACGGGAA                                     | <i>AtSOBIR1</i> and RT-PCR                  |
| to240       | GTGCTTGATCTGGGACACATGG                                      | <i>AtSOBIR1</i> and RT-PCR                  |
| to241       | AGAATTCAATCTTTATCCACCAGATCATGC                              | VIGS fragment <i>NbSOBIR1</i>               |
| to242       | AGGATCCCAGAAAGTTTCCAATGGCAG                                 | VIGS fragment <i>NbSOBIR1</i>               |
| to243       | AGGATCCTTGGAAATCTTGAACCTTC                                  | VIGS fragment <i>NbSOBIR1-like</i>          |
| to244       | ACTCGAGGATTTCTGAAAGATTTCAAG                                 | VIGS fragment <i>NbSOBIR1-like</i>          |
| to250       | CACCATGGGCAAAAGAACTAATCCA                                   | <i>SIEIX2</i>                               |
| to251       | GTTCCTTAGCTTTCCCTTCAG                                       | <i>SIEIX2</i>                               |
| to257       | CTCAACGCATAATTCACAGAAATTTAAAGCCAGC                          | <i>SISOBIR1D473N</i> mutation               |
| to258       | GCTGGCTTTAAATTTCTGTGAATTTATGCGTTGAG                         | <i>SISOBIR1D473N</i> mutation               |
| to259       | CTCAGCGTATAATTCACAGAAATCTAAAGCCAGGC                         | <i>SISOBIR1-likeD486N</i> mutation          |
| to260       | GCCTGGCTTTAGATTTCTGTGAATTTATACGCTGAG                        | <i>SISOBIR1-likeD486N</i> mutation          |
| to261       | CCCACGAATCATTCACAGAACTTAAAGCCAGCCAATG                       | <i>AtSOBIR1D489N</i> mutation               |
| to262       | CATTGGCTGGCTTTAAGTTTCTGTGAATGATTCGTGGG                      | <i>AtSOBIR1D489N</i> mutation               |
| to266       | CTTAGAAAACCTCTCTTAGC                                        | <i>NbSOBIR1</i> qRT-PCR                     |
| to267       | TATGGATTGGAGTGACATTATG                                      | <i>NbSOBIR1</i> qRT-PCR                     |
| to272       | GCAATTGTAGTACCAGTACAC                                       | <i>NbSOBIR1-like</i> qRT-PCR                |
| to273       | AATCAATGGACTGAAAAC                                          | <i>NbSOBIR1-like</i> qRT-PCR                |
| to45        | GGGGACAAGTTTGTACA AAAAAGCAGGCTTTATGG<br>ATCAGTCGGTGTGGCGA   | <i>SISERK3a/BAK1</i>                        |
| to46        | GGGGACCAC TTTGTACAAGAAAGCTGGGTTTCTTG<br>GCCCTGACAACCTCATCCG | <i>SISERK3a/BAK1</i>                        |
| to58        | TATGGAAACATTGTGCTCAGTGG                                     | <i>NbActin</i> RT-PCR and qRT-PCR           |
| to59        | CCAGATTGTCATACTCTGCC                                        | <i>NbActin</i> RT-PCR and qRT-PCR           |
| to88        | CACCATGGTGAAGGTGATGGAGAA                                    | <i>SISERK1</i>                              |
| to89        | CCTTGGACCCGATAATTTCAAC                                      | <i>SISERK1</i>                              |
| ITS1-F      | AAAGTTTAAATGGTTCGCTAAGA                                     | <i>V. dahliae</i> qRT-PCR                   |
| ST-VE1-R    | CTTGGTCATTTAGAGGAAGTAA                                      | <i>V. dahliae</i> qRT-PCR                   |
| AtRubF      | GCAAGTGTGGGTTCAAAGCTGGT                                     | <i>Arabidopsis Rubisco</i> qRT-PCR          |
| AtRubR      | CCAGGTTGAGGAGTTACTGGAATGCTG                                 | <i>Arabidopsis Rubisco</i> qRT-PCR          |



**Fig. S1.** Cf-4-eGFP is functional and efficiently immunopurified from stably transformed tomato and tomato *S/SOBIR1*-like and *Arabidopsis AtSOBIR1* interact with Cf-4 and Ve1, but not with various receptor-like kinases (RLKs). (A) Leaflets of the transgenic lines TL3 and TL21, stably transformed with the Cf-4-eGFP gene under control of the 35S promoter, were infiltrated with apoplastic fluid obtained from leaflets of susceptible Money Maker-Cf-0 plants colonized by *C. fulvum* secreting Avr4. TL3 mounted an HR by 2 d after infiltration, in contrast to line TL21, which did not respond to the Avr4 infiltration. (B) Cf-4-eGFP is detectably immunopurified from TL3, but not from TL21. Total protein extracts were subjected to immunopurification by using GFP-affinity beads and total proteins (Input), and immunopurified proteins (IP) were subjected to SDS/PAGE and analyzed by immunoblotting using  $\alpha$ GFP antibody. The Coomassie-stained blot shows the 50-kDa Rubisco band present in the input samples to confirm equal loading. (C) Tagged versions of Cf-4, Ve1, AtCLV1, *S/SERK1*, *S/SERK3a/BAK1*, and *S/FLS2* (all fused to eGFP, except for *S/FLS2*, which was fused to GFP) were coexpressed with *S/SOBIR1*-like-Myc and *AtSOBIR1*-Myc in *N. benthamiana*. Total protein extracts of transiently transformed leaf tissue were subjected to immunopurification by using GFP-affinity beads. Total proteins (Input) and immunopurified proteins (IP) were subjected to SDS/PAGE and blotted. Blots were incubated with  $\alpha$ GFP antibody to detect the immunopurified (e)GFP fusion proteins and incubated with  $\alpha$ Myc antibody to detect coimmunopurifying *SOBIR1*-Myc proteins. Coomassie-stained blots showing the 50-kDa Rubisco band present in the input samples confirm equal loading. Representative results for three independent experiments are shown.

#### Fig. S1

**Fig. S2.** Alignments of *SOBIR1* sequences from tomato, *Arabidopsis*, *N. benthamiana*, and tobacco. (A) Amino acid sequence alignment of *S/SOBIR1* (Solyc06g071810.1.1), *S/SOBIR1*-like (*S/SOBIR1-l*; Solyc03g111800.2.1), *AtSOBIR1*, and *S/SERK3a/BAK1* (*S/SERK3a/B*). Amino acid residues highlighted in black and dark gray represent identical residues in all four or three of the aligned protein sequences, respectively. Residues in light gray or white represent residues present in two sequences or are unique residues, respectively. The conserved RD motif, as well as the conserved residues K377 and E407 of *AtSOBIR1*, present in the kinase domain of all four proteins, are underlined. (B) Nucleotide sequence alignment of tomato *S/SOBIR1*, *S/SOBIR1*-like (*S/SOBIR1-li*), and *Arabidopsis AtSOBIR1* (AT2G31880.1) coding regions. Residues highlighted in black and gray represent identical nucleotides in all three or two of the aligned coding regions, respectively. Nucleotide sequences used for the TRV-based VIGS constructs are indicated by different colors as follows: TRV:*S/SOBIR1*, green; TRV:*S/SOBIR1*-like, blue; and TRV:*S/SOBIR1/SOBIR1*-like, red. (C) Nucleotide sequence alignment of *N. benthamiana NbSOBIR1*, tobacco *NtSOBIR1* (SGN-U441568), and *NbSOBIR1*-like (*NbSOBIR1-l*) coding regions. The available genomic sequence was used to obtain *NbSOBIR1* and *NbSOBIR1*-like sequences, and EST data provided the *NtSOBIR1* coding sequence. Intron sequences were manually removed from the *NbSOBIR1*-like sequence. Residues highlighted in black and gray represent identical nucleotides in all three or two of the aligned coding regions, respectively. Nucleotide sequences used for the TRV-based VIGS constructs are indicated by different colors as follows: TRV:*NbSOBIR1*, green; and TRV:*NbSOBIR1*-like, blue. TRV:*NbSOBIR1/NbSOBIR1*-like contains both of these fragments (*NbSOBIR1* and *NbSOBIR1*-like).

#### Fig. S2

**Fig. S3.** Cf-4 interacts with *S/SOBIR1* in a reverse immunoprecipitation assay, with *SOBIR1* mutants in the RD motif of the kinase domain, and with *S/SOBIR1* in the presence of Avr4, and *SOBIR1* does not form homo- or heterodimers. (A) *S/SOBIR1*-eGFP was coexpressed with Cf-4-Myc in *N. benthamiana*, and total protein extract was subjected to immunopurification by using GFP-affinity beads. The total protein extract (Input) and immunopurified proteins (IP) were subjected to SDS/PAGE and blotted. Blots were incubated with  $\alpha$ GFP antibody to detect immunopurified *S/SOBIR1*-eGFP, whereas coimmunopurified Cf-4-Myc was detected by using  $\alpha$ Myc. (B) Cf-4-eGFP was coexpressed with *S/SOBIR1*-Myc, *S/SOBIR1*<sup>D473N</sup>-Myc, *S/SOBIR1*-like<sup>D486N</sup>-Myc, and *AtSOBIR1*<sup>D489N</sup>-Myc in *N. benthamiana*. Immunopurifications and detection of proteins were performed as described in A. (C) Cf-4-eGFP was coexpressed with *S/SOBIR1*-Myc in the presence of Avr4 or Avr9 (the OD<sub>600</sub> of the *A. tumefaciens* cultures was either 0.2 or 0.4) in *N. benthamiana*. Leaves were harvested 1 d after agroinfiltration, which was just before the onset of an HR in the Avr4 agroinfiltrated leaves. Immunopurifications and detection of proteins were performed as described in A. (D) *S/SOBIR1*-eGFP was coexpressed with Cf-4-Myc, *S/SOBIR1*-Myc, *S/SOBIR1*-like-Myc, and *AtSOBIR1*-Myc. After 2 d, *S/SOBIR1*-eGFP was immunopurified, and the samples were analyzed for copurification of the Myc-tagged versions. Immunopurifications and detection of proteins were performed as described in A. All assays were performed twice, and a representative picture for each experiment is shown.

#### Fig. S3

**Fig. S4.** *S/SOBIR1*-eGFP localizes to the plasma membrane and cytoplasmic vesicles. Proteins were transiently expressed in *N. benthamiana* epidermal leaf cells, and their subcellular localization is shown. Each image shows a combination of the eGFP signal (green) and the chloroplast signal (red). (A) *S/SOBIR1*-eGFP localizes to the plasma membrane. When focusing on top of the plasma membrane, *S/SOBIR1*-eGFP is also detected in distinct spots that resemble cytoplasmic vesicles. (B) *S/FLS2*-GFP typically localizes to the plasma membrane. (C) GFP-HA localizes to the cytosol and the nucleus. (D) An untransformed plant was used as a negative control. Representative pictures for three independent experiments are shown.

#### Fig. S4

**Fig. S5.** SOBIR1 kinase activity is essential for its role in Cf-4-mediated HR. (A) Expression of *NbSOBIR1* is efficiently knocked down by inoculation of *N. benthamiana* with TRV:*NbSOBIR1/NbSOBIR1-like*. (B) Expression of *NbSOBIR1* is efficiently knocked down by inoculation of *N. benthamiana* with TRV:*NbSOBIR1*. Inoculation with TRV:*NbSOBIR1-like* results in slight cross-silencing of *NbSOBIR1* expression. For A and B, plants were inoculated with TRV:*GUS* or the indicated constructs targeting *NbSOBIR1*s, and relative expression of *NbSOBIR1* was determined by qRT-PCR for each sample. Samples were normalized to endogenous *NbActin*. SDs show the variation between three technical repeats. In total, two biological experiments were performed with similar results, and a representative result is shown. (C) Kinase activity of SOBIR1 is required for Cf-4-mediated HR. Transgenic *N. benthamiana*:*Cf-4* plants were subjected to VIGS by inoculation with TRV:*NbSOBIR1/NbSOBIR1-like*. Three weeks later, mature leaves were agroinfiltrated to transiently express the combinations *GUS* + *Avr4*, *AtSOBIR1-Myc* + *Avr4*, and *AtSOBIR1<sup>D489N</sup>-Myc* + *Avr4*, as indicated. *GUS*, *AtSOBIR1-Myc*, and *AtSOBIR1<sup>D489N</sup>-Myc* were infiltrated at final OD<sub>600</sub> = 0.7 and *Avr4* at OD<sub>600</sub> = 0.03. (D) RT-PCR analysis confirms that *AtSOBIR1-Myc* and *AtSOBIR1<sup>D489N</sup>-Myc* are not targeted by TRV:*NbSOBIR1/NbSOBIR1-like*—inoculation of *N. benthamiana*. Three weeks after inoculation with the indicated TRV constructs, leaves were agroinfiltrated with *AtSOBIR1-Myc* or *AtSOBIR1<sup>D489N</sup>-Myc*. RNA was isolated, transcribed into cDNA, and used as a template for RT-PCRs using primers amplifying *AtSOBIR1* or endogenous *NbActin*. The amount of PCR cycles is indicated.

#### Fig. S5

**Fig. S6.** SOBIR1 is required for autoactivity of the Cf homolog Peru2, Ve1-mediated HR in tobacco, and Cf-2.2- and Ve1-mediated resistance in tomato. (A) Peru2 autoactivity is compromised upon silencing of *NbSOBIR1*. *N. benthamiana* plants were subjected to VIGS by inoculation with TRV:*NbSOBIR1/NbSOBIR1-like*. Three weeks after TRV inoculation, Peru2-eGFP was transiently expressed by agroinfiltration at four sites in the leaves, and leaves were photographed 3 d later. (B) The Ve1-mediated HR is compromised upon targeting *NtSOBIR1* homologs in tobacco. *N. tabacum* cultivar Samsun was subjected to VIGS by inoculation with the TRV constructs indicated above each image. TRV:*EDS1* and TRV:*GFP* served as controls. Three weeks after TRV inoculation, Ve1 and Ave1 were coexpressed, and leaves were photographed 5 d later. The experiments were performed three times with three plants for each TRV construct, and representative pictures for the experiments are shown. (C) Targeting *SISOBIR1* and *SISOBIR1-like* suppresses Cf-2.2-mediated resistance to *C. fulvum* expressing *Avr2*. Cf-2.2-expressing tomato was inoculated with TRV:*SISOBIR1/SISOBIR1-like* or TRV:*GUS*, and 3 wk later plants were inoculated with an *Avr2*-secreting, *GUS*-transgenic strain of *C. fulvum*. Two weeks later, leaflets were stained for GUS activity to detect *C. fulvum* colonization. The amount of successful colonization attempts (blue spots) vs. the total amount of leaflets analyzed for that particular treatment is indicated between parentheses. (D) Tomato cultivar Motelle (carrying *Ve1*) was subjected to VIGS by inoculation with the constructs indicated above each image. TRV:*GFP*, TRV:*Ve1*, and non-TRV-inoculated Motelle plants were included as controls. Each image shows a mock (M)-treated plant on the left and a *V. dahliae* (Vd)-inoculated plant on the right. Stunting of the *V. dahliae*-inoculated plants, compared with the mock-treated plants indicates compromised resistance. Percentages between parentheses indicate the average canopy area (and SDs) of *V. dahliae*-inoculated plants in three independent experiments compared with the control mock treatment, for which the canopy area was set to 100%. Representative photographs for three independent experiments are shown.

#### Fig. S6

**Fig. S7.** Quantification of *V. dahliae* biomass in *Arabidopsis sobir1-1* and *sobir1-1 Ve1*-complemented lines and expression of Cf-4 and Ve1 in *N. benthamiana* silenced for the *NbSOBIR1* homologs. (A) Relative quantity (R.Q.) of fungal biomass present in the plants shown in Fig. 4, as determined by qRT-PCR. SDs show the difference between technical repeats. The inoculation experiments and qRT-PCR quantifications were performed three times, with similar results. (B) *Cf-4-eGFP* and *Ve1-eGFP* are expressed in *N. benthamiana* silenced for the *NbSOBIR1* homologs. *N. benthamiana* was subjected to VIGS by inoculation with the indicated TRV constructs and subsequently transiently transformed to express *Cf-4-eGFP* or *Ve1-eGFP*. RNA was isolated, transcribed into cDNA, and used as a template for RT-PCRs using primers amplifying *Cf-4*, *Ve1*, and endogenous *NbActin*, respectively. The amount of PCR cycles is indicated.

#### Fig. S7

**Fig. S8.** *SISOBIR1* and *SISOBIR1-like* interact with all Cf proteins tested and with the receptor-like proteins (RLPs) *S/EIX2*, *S/CLV2*, and *S/TMM*, but not with *S/SNC2*. (A) Cf-2.2, -4E, -9, and the autoactive Cf homolog Peru2, all C-terminally fused to eGFP, were coexpressed with *SISOBIR1-Myc* and *SISOBIR1-like-Myc* in *N. benthamiana*, and the proteins fused to eGFP were immunopurified by using GFP-affinity beads. Total proteins (Input) and immunopurified proteins (IP) were subjected to SDS/PAGE and blotted. Blots were incubated with  $\alpha$ GFP antibody to detect the immunopurified proteins fused to eGFP, and  $\alpha$ Myc antibody was used for detection of coimmunopurified *SISOBIR1-Myc* and *SISOBIR1-like-Myc*. Coomassie-stained blots showing the 50-kDa Rubisco band present in the input confirm equal loading. The assay was performed twice, and a representative picture is shown. (B) The indicated RLPs, fused to eGFP, were coexpressed with *SISOBIR1-Myc* or *SISOBIR1-like-Myc* in *N. benthamiana* and immunopurified by using GFP-affinity beads. Total proteins (Input) and immunopurified proteins (IP) were subjected to SDS/PAGE and blotted. Blots were incubated with  $\alpha$ GFP antibody to detect the immunopurified RLP-eGFP fusion proteins, and coimmunopurified *SISOBIR1-Myc* and *SISOBIR1-like-Myc* were detected by using  $\alpha$ Myc antibody. Coomassie-stained blots showing the 50-kDa Rubisco band present in the input confirm equal loading. The assay was performed three times, and a representative picture is shown.

#### Fig. S8
