# Supplementary material
Source: PubMed Central journal article supplement (PMC3683720)
Supplement: 1220015110_sfig02.pdf [file 1220015110_sfig02.pdf]

# A

```

      *           20           *           40           *           60
S1SOBIR1 : ---MTSNIHFFI---LYVVSIFLFLVQAR-----INLYPPDHAALLLVQKDLGIISVN-- : 46
S1SOBIR1-1 : MFTASYIHLSF---LSFFTIVILLVQAK-----INLYSPDHSALLLVQKGLGIPARNV : 51
AtSOBIR1 : MAVPTGSANLFLRPLILAVLSFLLLSFFVSSVEWLDIDSSDLKALQVIE TELGVNSORSS : 60
S1SERK3a/B : MDQSVLAIWVFL----CLIGLLFNLSPVAG----NAEGDALNALKTNLADPNSVLQSWD : 51

      *           80           *           100          *           120
S1SOBIR1 : ---NPCTLAGISCERRPGNTT--QVVRVTRIVFRSNGIKGILSSAIGKLTTELKELSLSD : 100
S1SOBIR1-1 : L--ENPCNSVGISCEKRLINNS--NVLRVTRVVFKSYGLKGLSPAIGRLSELKELSLQN : 107
AtSOBIR1 : ASDVNPCGRRGVFCERRHSATTGEYVLRVTRLVYRSRSLTGTIISPVICMLSELKELIISN : 120
S1SERK3a/B : ATLVPNCTWFHVTGNNE-----NSVTRVDLGNANLSCQLVLQQLQQLQYLETYS : 102

      *           140          *           160          *           180
S1SOBIR1 : NQLSEQIPVQIIDCRKLEILQLQRNRFSGKIPSELSAALNRRLRVDFSSNEFSGNLDFLKY : 160
S1SOBIR1-1 : NKLFDRIPTEIVDSRKLEILNLQNNQFSGKVPELSSIVRLRLDIDGSELNLSGNLNFLLKY : 167
AtSOBIR1 : NQLVNAVVPVDIILSCKQLEVLDIRKNRFSGQIPGNEFSSLSRLRLDIDSSNKLSCGNLNFLLK : 180
S1SERK3a/B : NNISGRIPNELGNLTELVSLLDLYLNNLNGPIPPSIRLQKLRERLNNNSLN----- : 154

      *           200          *           220          *           240
S1SOBIR1 : FPNLEKLSLADNMFTGKIPFSLKSEFNLRLRLINISGNSFLEGPVPVMSQTEHLSADLNRKN : 220
S1SOBIR1-1 : FPNLEKLSLADNMFTGRIPQSLKSEFNLRLRLINISDNSEFLEGTVPVVSQVEHLSFDLNRKD : 227
AtSOBIR1 : LRNLENLSVANNLFSGKIPEQIVSEHNLRFEEFDSGNRYLEGPAPVMSSTKLOTSFPHQT-- : 238
S1SERK3a/B : -----EGIPMSLTTIVALQVLDISNN-HLTGLVPVNGSFSLET----- : 191

      *           260          *           280          *           300
S1SOBIR1 : GVPKRYILAENSTR---ISAMGPASVP--APAPAVNRVVPAMHKRKNKKR--KIRSTFELG : 274
S1SOBIR1-1 : YVLKRYILAENATRPRHSPAMAPESKSRYAQAPGPESTVVVVKKDKHNKIRKRVGAWILG : 287
AtSOBIR1 : ----RHILAETPTS---SPTNKPNNSTT-SKAPKGA PKPKGLKKKK KKS K KVAWILG : 290
S1SERK3a/B : -----PISFANNQLEVPPVSEPEPLPPTSSSSSSVGN SATGATAGVA : 234

      *           320          *           340          *           360
S1SOBIR1 : FLACTFAGGISAVLCSLLFKMVMFFVRRGNNDSSLTIIYSPLIKKAEDLAFLEKEDGVASL : 334
S1SOBIR1-1 : FFAGVFAGGLSALIFSVLCKVLMFLIRGIRNDPGLTIFSPLIKKAEDLAFLENEDEGLDSL : 347
AtSOBIR1 : FVVGAI GGTISGFVFSVLFKLI IQAIRGSEKPPGPSIFSPLIKKAEDLAFLENEEAASL : 350
S1SERK3a/B : AGAALLFAAPAI FLAWWRRRKPDHFFDVPAAEDPEVHLGQLKRFSLRELVASDNFSNR : 294

      *           380          *           400          *           420
S1SOBIR1 : EMIGKGGCGEVYRAELPGSNGKIIAIIKIIQSEMDAAEITTEEDTKALNKKMRQVRSEIQI : 394
S1SOBIR1-1 : ELIGQGGCGKVYKAALPGSDGKIIAVKKIIQPEKDAEITTEEDSKAMNKKMRQIRSEIKI : 407
AtSOBIR1 : EIIGRGGCGEVFKAELPGSNGKIIAVKKVIQPEKDADELIDEDESKFELNKKMRQIRSEINT : 410
S1SERK3a/B : NILGRGGFGKVYKGRLL--ADGSLVAVKRLKEERTQGGEL-----QFQTEVEM : 339

      *           440          *           460          *           480
S1SOBIR1 : VGQIRHRNLLPLLAHMPRPDCHYLVEYBYMKNGLSDIILQOVTEGTRELDLWLGRRRIAGV : 454
S1SOBIR1-1 : VGQIRHRNLLPLLAHMPRPDCHYLVEYBYMKNGLSDITLQOVRECKRELDWSARRRIANGI : 467
AtSOBIR1 : VGHIRHRNLLPLLAHVSRPECHYLVEYBYMEKGLSDIILTDVQAGNQEIMWPARKIANGI : 470
S1SERK3a/B : ISMAVHRNLLRLRGFCMTPTERTVLVYPYMENGSVASRIRERPESEPELLWPKRRIALCS : 399

      *           500          *           520          *           540
S1SOBIR1 : AAGLEYLHINHTRQRIIHRDLK PANILLDDMEARVADFGLAKAVPDAHTHTITTSNVAAGTV : 514
S1SOBIR1-1 : AAGLEYLHINHTRQRIIHRDLKPGNVLLDDMEARVADFGLAKAVPDAHTHTITTSNVAAGTI : 527
AtSOBIR1 : AAGLEYLHMDHNPRIIHRDLK PANVLLDDMEARVADFGLAKAMPDAVHTHTITTSNVAAGTV : 530
S1SERK3a/B : ARGLAYLHDHCDEPKI IHRDVKAANILLDEEFVAVVGFDFGLAKLMDYKDTHTVTT-AVRGTI : 458

```

```

          *           560           *           580           *           600
SISOBIR1 : GFIAPEYYQTLKFTDKCDIYSFGVVLAVLVIGKGPSD-DFFOHTSEMSLVKWLNRNVMISD : 573
SISOBIR1-1 : GYIAPEYHQTLKFTDKCDIYSFGVLLGVLMGKLPD-EFFQNTSEMSLVKWMRNVMITSE : 586
AtSOBIR1 : GYIAPEFYQTHKFTDKCDIYSFGVILGILVIGKLPD-EFFQHTDEMSLIVWMRNIIITSE : 589
SISERK3a/B : GHIAPEYLSLTKSSSEKTDVFEVGYGVMLLELVIGRAFDLARLANDDDVMLLDWVKGLLKDK : 518

```

```

          *           620           *           640           *           660
SISOBIR1 : DPKIAIDPKLIGNGYDEQMLLVLKIACFCTIDNPKERPNSKDVRCMLTQIKH----- : 625
SISOBIR1-1 : DPNRAIDPKLMGNGNEDQMLLVLKIACFCTMENPKERPNSKDVRCMLMQIKH----- : 638
AtSOBIR1 : NPSLAIDPKLMDQGFDEQMLLVLKIACYCTLDDPKQRPNSKDVRCMLTQIKH----- : 641
SISERK3a/B : KYETLVADLQGNYNEEVEQLIQVALLCTQSTPTERPDKMSEVVRMLLEGDGLAERWEEWQ : 578

```

```

          *           680           *
SISOBIR1 : ----- : -
SISOBIR1-1 : ----- : -
AtSOBIR1 : ----- : -
SISERK3a/B : KEEMFRQDYNHVHHPHTDWIADSTSNIRPDELSGPR : 615

```

## B

\*                    20                    \*                    40                    \*                    60  
*S1SOBIR1* : ATGAC-----TTCGAATATCCACTTTTTC : 25  
*S1SOBIR1-li* : ATGACC-----TTCACAGCCTCATATATACACCTTTCTT : 34  
*AtSOBIR1* : ATGGCTGTTCCACGGGAAGCGCAATCTCTTCTCCTCGCCTCTCATCCTCGCGTTC : 60

\*                    80                    \*                    100                    \*                    120  
*S1SOBIR1* : TTTTATACGTTGTGAGCCTTTTCTTTTGT---TCAAGCAAGATTGAATCTTTATCCAC : 82  
*S1SOBIR1-li* : TTTTGTCTTTTTTCACTGTTCATCCITCTTGT---TCAAGCAAACTATAACCTTTACTCAC : 91  
*AtSOBIR1* : TCCTTTCTTCTTCTCTCTTCATTCGTCTCTCTCTGTTGAGT--GGCTCGAATATCGATTCT : 118

\*                    140                    \*                    160                    \*                    180  
*S1SOBIR1* : CAGATCATGCTGCACTCTTGTGTTACAAAAGGACTTAGGCATC-----ATTT : 130  
*S1SOBIR1-li* : CTGATCACAGTGCTCTTTTGTGTTCCAAAAGGCTTAGGCATCCCTGCTCAGCCCAATG : 151  
*AtSOBIR1* : CAGATCTCAAAGCTCTTCAGGTCATCGAAACAGAGCTCGGAGTCAACAGTCAACCTTCT : 178

\*                    200                    \*                    220                    \*                    240  
*S1SOBIR1* : C-----TGTTAACAACCCGTGTACGCTCGCAGGAATATCGTCCGACCTAGACCGGGTA : 184  
*S1SOBIR1-li* : T-----TCTTGAGAACCATGCAACTCTGTTGGAATATCATGCCGAAACAGACTCA-TA : 204  
*AtSOBIR1* : CGGCCAGTGAATGTCAACCCTTGGGCTCGCGAGGAGTTTCTGCGAGAGACGGCACTCTG : 238

\*                    260                    \*                    280                    \*                    300  
*S1SOBIR1* : ACACAACAAGT-TG-----TGAGAGTTACCCGTATTGTATTTCAGATCCAACGGATTAA : 238  
*S1SOBIR1-li* : A-ACAATTCAAATGTGC-----TAAGAGTCCAAAGGTTGTCTTCAAATCCACCGGTTGA : 259  
*AtSOBIR1* : CCACCACGGGAGAATACGTTCTCCGTGTACAGAGGCTCGTCTACCGATCCAGGACCTTGA : 298

\*                    320                    \*                    340                    \*                    360  
*S1SOBIR1* : AGGGAACTTTGTCTTCTGCTATTGGCAAATCACTGAGCTCAAAGAGCTTTCTCTTTCG : 298  
*S1SOBIR1-li* : AGGGTACTCTGTCTCCTGCCATTGGGAGGCTTCTGAGCTCAAAGAGCTGTCCCTCCAAA : 319  
*AtSOBIR1* : CGGGACTATCTCTCCGGTCATCGGAATGTTGTCGGAGCTCAAGGAATTAATTGTCATA : 358

\*                    380                    \*                    400                    \*                    420  
*S1SOBIR1* : ACAATCAACTATCTGAACAAATCCCCTGTTGAGATTATGATTGTCCGGAAGTTAGAGATTC : 358  
*S1SOBIR1-li* : ACAACAAACTCTTTGACAGAAATACCAACTGAAATAGTTGACTCCAGAAATTTGAAATCT : 379  
*AtSOBIR1* : ATAACCAGTTGGTCAACGCTGTTCCGGTGGATATCTTAAAGCTGTAAGCAAATGAAATTC : 418

\*                    440                    \*                    460                    \*                    480  
*S1SOBIR1* : TTCAACTTCAAAGGAACAGATTTTCTGGGAAAGATCCATCCGAAATTGTCAGTTTAAACC : 418  
*S1SOBIR1-li* : TGAACCTTCAAAAACAACCAATTTTCTGGCAAAGTCCACCTGAATTATCATCTCTAGTCC : 439  
*AtSOBIR1* : TTGATCTTCCGAAAAATAGATTTTCCGGTCAGATCCGGGAAACTTTCTACTTTGAGCC : 478

\*                    500                    \*                    520                    \*                    540  
*S1SOBIR1* : GTTTAAGGATAGTTGACTTTTTCATCGAATGAGTTTTCGGGAAATCTGATTTCTTGAAGT : 478  
*S1SOBIR1-li* : GACTTCGTATCCTTGACCTTGGCTCTAATGAGTTATCTGGGAACTGAACTTCTTGAAT : 499  
*AtSOBIR1* : GTCTTCGAATCCTTGATCTCTCTTCGAACAAGTTATCCGGGAACTTGAATTTCTTGAACA : 538

\*                    560                    \*                    580                    \*                    600  
*S1SOBIR1* : ACTTTCCTAACTCGAAAAAAGTCTCTCTGGCTGATAAATATGTTTCACTGGAAATAATCCAT : 538  
*S1SOBIR1-li* : ACTTTCCTAACCTTGA AAAAAGTCTCTCTGGCTGATAAATATGTTTCACTGGGAGAATACTC : 559  
*AtSOBIR1* : ATCTACGCAATCTGGAGAATCTCTCTGTTGAAAACAATCTCTTCTCAGGCAAAATCCGG : 598

*S1SOBIR1* : TTTCAATTGAAATCTTTCCGAAATCTTCGTTTCTCACAACATTTTCAGGGAATAGTTTCCTTG : 598  
*S1SOBIR1-li* : AATCCTTGAAATCTTTTCAGAAATCTCCGGCTCCTCACAACATTTTCAGACAATAGTTTCCTTG : 619  
*AtSOBIR1* : AACAAATTGTGTCGTTCCACAATCTCCGGTTCCTTTGATTTCTCCGGAACCCGTATTTGG : 658

*S1SOBIR1* : AAGGTCAGTACCTGTCATGAGCCAAATTCAGCATTTATCAGCAGATTTGATCGAAAA : 658  
*S1SOBIR1-li* : AAGGTACGGTGCCTGTCGTGAGTCAAGTTCAGCATTATCAACAGACTTAAATCGAAAAG : 679  
*AtSOBIR1* : AAGGTCGGCTCCGGTTATGAGCAGTATCAAGC-TTCA--GACATCTCCAATCAAAACA : 715

*S1SOBIR1* : ATGGCGTTCCATAAAGGTTACATTCCTAGCTGAGAAATTCACACAGGATAT-----CTG : 709  
*S1SOBIR1-li* : ATTATGTTCTTAAGCGTTACATTCCTGCTGA GAACGCAACAAGGCCACGGCACAGCCCTG : 739  
*AtSOBIR1* : GACACATTCCTT--GC-TGAAACTCCAACTTCAAGTCCACAGAACAA-----CAA : 764

*S1SOBIR1* : CAATGGGACCTGC-TTCGGT--TCCAG-----CTCCAGCTCCAGCACCTT-GT-CAATCGT : 759  
*S1SOBIR1-li* : CAATGGCACCGGAGTCCAAA--TCAAGATATGCCAAGCTCCAGCACCTTGTACAGTTGT : 797  
*AtSOBIR1* : CAACAGCACT-ACATCAAAAAGCTCCAAAAG-----GAGCTCCAAAACCAGCG-AACTTGA : 817

*S1SOBIR1* : GTTGTACCGGCGATGCA---TAAACGTAAGAACAAGAAAAGGAAGTTACCATCTTGGTTT : 816  
*S1SOBIR1-li* : A--GTACCAGTAAAAAAGACAAACATAACAAGATCAGAAGGAAGGTAGGCGCTGGATT : 855  
*AtSOBIR1* : A-----GAAGAAG---AAGAA GAAGAGCAAGAA GAAGAAAGTACCGCATGGATC : 864

*S1SOBIR1* : CTTGGTTTCTAGCTGGAACTTTTCTGGGGTATATCTGCTGTGCTCTGTTCCTTGGTA : 876  
*S1SOBIR1-li* : CTTGGATTCTTTGCTGGAGTTTCTGCTGGGGCTTATCAGCGTTGATCTTCTCCGTCT : 915  
*AtSOBIR1* : TTAGGGTTTGTCTGTTGGAGCCATAGGAGGAACAATCTCTGGGTTTGTCTTCTCGCTTTG : 924

*S1SOBIR1* : TTC AAGATGGTAATGTTCTTTCGTAAGAAGAGG-GAATAACGATTCAAGTTTAAACCATATA : 935  
*S1SOBIR1-li* : TGCAAGGTGCTTATGTTTTTGATCAGAGGGAT-CAGAAATGATCCAGGCCTTAAACAATTT : 974  
*AtSOBIR1* : TTC A AATGAT TAT TCAAGCAATAGAGGATCAGAAAACCA-CCAGGTCTTCCATATTT : 983

*S1SOBIR1* : CAGTCCACTGATCAAGAAAGCCGAGGACTTGGCTTCTTAGAGAAGGAAGATGGACTGGC : 995  
*S1SOBIR1-li* : CAGTCCATTGATTAAGAAAGCCGAGCACTTGGCTTCTTAGAGAAGGAAGATGGATTGCA : 1034  
*AtSOBIR1* : CAGCCATTGATCAAGAAAGCTGAACATTTAGCTTCTTAGAGAAGGAAGAACCGTATAGC : 1043

*S1SOBIR1* : ATCGCTTGAATGATTGGAAAAGGTGGCTGTGGAGAAGTTTATAGAGCAGACTACCAGG : 1055  
*S1SOBIR1-li* : ATCACTAGAACTCATTGGCAAGGTGGATGTGGAAAAGTTTATAAGCTCCATTACCTGG : 1094  
*AtSOBIR1* : TTCTCTGGACATCATAGGAAGAGGAGGTGTGTGGAGAAGTTTCAAGCTGAAGTACCAGG : 1103

*S1SOBIR1* : CAGTAATGGGAAGATTATAGCTATAAAGAAGATTATCCAATCCCAATGGATGCTGCAGA : 1115  
*S1SOBIR1-li* : AAGTGACGGAAAGATTATAGCTGTAAAGAAGATCATACAACACCCTAAGGATGCTGCAGA : 1154  
*AtSOBIR1* : AAGCAATGGGAAGATCATAGCTGTAAAGAAGTATCAACCCCTAAGAGCAGCCGATGA : 1163

\* 1220 \* 1240 \* 1260  
*S1SOBIR1* : GATCACGGAGGAAGATACTAAGGCCTTGAACAAGAAAATGCGTCAACTTAAATCAGAAAT : 1175  
*S1SOBIR1-li* : ACTCACTGAGGAAGATAGCAAGGCTATGAATAAGAAAATGCCAGATTAAATCAGAAAT : 1214  
*AtSOBIR1* : ACTAACAGATGAAGATTCCAAGTTTCTGAACAAGAAAATGAGGCAAATTAGATCCGAGAT : 1223

\* 1280 \* 1300 \* 1320  
*S1SOBIR1* : TCAAATTGTAGGTCAAATCAGACACCGGAATCTGCTTCCATTACTCGCCATATGCCAAG : 1235  
*S1SOBIR1-li* : CAAAATTGTAGGTCAAATCAGACACCGGAATTTGCTTCCCTACTGGCCATATGCCAAG : 1274  
*AtSOBIR1* : CAACACAGTCCGCCATATCCGGCACCGGAATCTTCTCCATTGTTAGCACACGTGTC AAG : 1283

\* 1340 \* 1360 \* 1380  
*S1SOBIR1* : GCCAGACTGTTCATTACTTGGTCTACGAATACATGAAAAATGGGAGTTTACAGGATAATCCT : 1295  
*S1SOBIR1-li* : ACCAGACTGCCACTACTTGGTCTATGAGTACATGAAAAATGGGAGCTTACAGGATAACCT : 1334  
*AtSOBIR1* : ACCCGAGTGCCACTACTCTCGTTTACGAGTACATGAAAAAGGGAGTTTGCAGATAAAT : 1343

\* 1400 \* 1420 \* 1440  
*S1SOBIR1* : GCAGCAAGTCACAGAAGGCACAAGGGAATTAGATTGGTTGGGACGACACAGAATTGCCAGC : 1355  
*S1SOBIR1-li* : CCAGCAAGTCAGAGAGGGGAAACGGGAACTAGATTGGTCCGCCAGCTCACCGAATTGCCAAT : 1394  
*AtSOBIR1* : GACTGACGTACAAGCTGGAAATCAAGAACTAATGTGGCCAGCGAGGCACAGATTGCTTT : 1403

\* 1460 \* 1480 \* 1500  
*S1SOBIR1* : GGGGTAGCTGCTGGTCTCGAGTATCTCCATATAAACCATACTCAACCGCATTAATTCACAG : 1415  
*S1SOBIR1-li* : GGGAATAGCTGCTGGACTCGAGTATCTCCATATAAATCATACTCAGCGTATAATTCACAG : 1454  
*AtSOBIR1* : AGGTATAGCTGCAGGGCTTGAGTACCTTCCATGGATCATAACCCACGAATCATTACAG : 1463

\* 1520 \* 1540 \* 1560  
*S1SOBIR1* : AGATTTAAAGCCAGCAAATATCTCTACTTGATGATGACATGGAAGCTCGAGTTCTGATTTT : 1475  
*S1SOBIR1-li* : AGATCTAAAGCCAGGCAATGCTCTCTGATGATGACATGGAAGCTCGAATTCGGATTTT : 1514  
*AtSOBIR1* : AGACTTAAAGCCAGCCAATGTTCTTCTTGATGATGACATGGAAGCCAGAAATTCAGATTT : 1523

\* 1580 \* 1600 \* 1620  
*S1SOBIR1* : TGGCCTTGCAAAGGCAGTTCCAGATGCTCATACACATATCACCACCTCAAATGTTGCAGG : 1535  
*S1SOBIR1-li* : TGGCCTTGCAAAGGCCTGTTCCAGATGCTCATACACATATTACACCTCAAATGTTGCAGG : 1574  
*AtSOBIR1* : CGGACTGGCAAAGGCAATGCCAGATGCAGTCAACACATATTACACCTCGCATGTTGCAGG : 1583

\* 1640 \* 1660 \* 1680  
*S1SOBIR1* : AACTGTTGGATTTTATTGCACCAGAAATATATCAGACACTGAAGTTTACAGATAAGTGTGA : 1595  
*S1SOBIR1-li* : AACTATAGGATACATCGCTCCAGAAATATCATCAGACACTGAAGTTTACTGATAAAGTGTGA : 1634  
*AtSOBIR1* : TACTGTGGGATACATAGCACCAGAGTTTATCAAACCCACAAGTTTACAGATAAATGTGA : 1643

\* 1700 \* 1720 \* 1740  
*S1SOBIR1* : TATATACAGCTTTGGTGTGCTGCTAGCTGTGTGGTTATCGGTAAAGGCTCCATCGATGA : 1655  
*S1SOBIR1-li* : TATATACAGCTTTGGGGTGCTGCTAGGCGTGTAGTTATGGAAAGCTTCCATCTGATGA : 1694  
*AtSOBIR1* : TATCTATAGTTTTGGAGTGATTTCTTGGGATTTCTGCTGATTTGGGAAGCTTCCATCAGATGA : 1703

\* 1760 \* 1780 \* 1800  
*S1SOBIR1* : TTTTTTCCAACATACTTCTGAGATGAGTTTAGTTAAGTGGCTGAGGAATGTAATGACTTC : 1715  
*S1SOBIR1-li* : GTTCTTCCAAAACACGTTCTGAGATGAGTTTAGTCAAATGGATGAGAAAATGTCATGACTTC : 1754  
*AtSOBIR1* : GTTTTTTTCAGCAATACAGGAGATGAGTCTGATAAAGTGGATGAGGAACATAAATAACATC : 1763

```

          *      1820          *      1840          *      1860
SISOBIR1 : TGACGATCCTAAATAGCAATTGATCCTAAGCTTATAGGAATGGATACGACGAACAAAT : 1775
SISOBIR1-li : TGAGGATCCAAACAGAGCAATTGATCCAAAGCTGATGGGTAATGGAAATGAGGACCAAT : 1814
AtSOBIR1 : GGAAAATCCTAGCCTTGCGATTGATCCGAAGTTCATCGATCAAGGATCGATGAACAGAT : 1823

```

```

          *      1880          *      1900          *      1920
SISOBIR1 : GCTTTTGGTTCTCAAGATAGCTTGCTTTTGTACTCTCGACAATCCAAGGAGAGGCCAA : 1835
SISOBIR1-li : GCTTTTGGTTCTCAAGATTGCTTGCTTTTGTACCATCGAGAATCCCAAGGAGAGGCCAA : 1874
AtSOBIR1 : GCTTCTGGTTCTGAAGATCGCCTGTTACTGTACTTTGGATGATCCCAAACAGAGGCCGAA : 1883

```

```

          *      1940          *      1960
SISOBIR1 : CAGTAAGGATGTTAGGTGCATGTTAACTCAGATCAAGCAATTAG : 1878
SISOBIR1-li : TAGTAAGGATGTTAGGTGCATGTTGATGCAGATCAAGCAATFAA : 1917
AtSOBIR1 : CAGTAAAGATGTCAGGACCATGTTGTC CAGATCAAGCACTAG : 1926

```

# C

|                   |     |          |          |          |            |            |           |         |        |         |        |       |       |     |     |
|-------------------|-----|----------|----------|----------|------------|------------|-----------|---------|--------|---------|--------|-------|-------|-----|-----|
|                   | *   | 20       | *        | 40       | *          |            |           |         |        |         |        |       |       |     |     |
| <i>NbSOBIR1</i>   | :   | ATGGCCTT | CACTGCTT | TCACAAAT | CACTTCTTTT | CTTCTCACTT | TTTC      | CCCTTTT | :      | 55      |        |       |       |     |     |
| <i>NtSOBIR1</i>   | :   | ATGGCCTT | CACTGCTT | TCACAAAT | CACTTCTTTT | CTTCTCACTT | TTTC      | CCCTTTT | :      | 55      |        |       |       |     |     |
| <i>NbSOBIR1-1</i> | :   | ATGGCCTT | CACTACCT | TCCATAT  | CACTTCTTTT | CTTCTCACTT | TTTC      | CCCTTTT | :      | 54      |        |       |       |     |     |
|                   |     |          |          |          |            |            |           |         |        |         |        |       |       |     |     |
|                   | 60  | *        | 80       | *        | 100        | *          |           |         |        |         |        |       |       |     |     |
| <i>NbSOBIR1</i>   | :   | TACTTATT | TGCTGTT  | CAAGCAAG | ACTGAA     | TCTTTTAT   | CCACCAGAT | CATGCT  | GC     | CACT    | :      | 110   |       |     |     |
| <i>NtSOBIR1</i>   | :   | TACTTATT | ---      | GTTCAAG  | CAAAACT    | TAAATCT    | CTATCC    | ACCAGAT | CATGCT | GC      | CACT   | :     | 107   |     |     |
| <i>NbSOBIR1-1</i> | :   | TCCTTCAT | ---      | GTTCAAG  | CAAGAA     | TCAACCT    | TTACTC    | GCCAGAT | TATAGT | GC      | TCT    | :     | 106   |     |     |
|                   |     |          |          |          |            |            |           |         |        |         |        |       |       |     |     |
|                   | 120 | *        | 140      | *        | 160        |            |           |         |        |         |        |       |       |     |     |
| <i>NbSOBIR1</i>   | :   | TTTGCTT  | TGTCCAAA | AAGACTT  | TGGGCAT    | CCAAGG     | TCAACGC   | ATTGC   | -----  | AC      | :      | 157   |       |     |     |
| <i>NtSOBIR1</i>   | :   | TTTGCTT  | TGTCCAAA | AAGACTT  | TGGGCAT    | CCAAGG     | TCAACGC   | ATTGC   | -----  | AC      | :      | 154   |       |     |     |
| <i>NbSOBIR1-1</i> | :   | TTTGGTT  | TGTCCGAA | AAGGCTT  | TAGACG     | TCCCTAG    | ACAAC     | TTAGT   | GC     | TATAGAG | AAC    | :     | 161   |     |     |
|                   |     |          |          |          |            |            |           |         |        |         |        |       |       |     |     |
|                   | *   | 180      | *        | 200      | *          | 220        |           |         |        |         |        |       |       |     |     |
| <i>NbSOBIR1</i>   | :   | TT-TGCA  | ACTCTG   | CAACA    | TATCCT     | TGTGAA     | AGGCGAA   | AGGCAAA | CAGAAC | ACA     | CAAT   | :     | 211   |     |     |
| <i>NtSOBIR1</i>   | :   | TT-TGCA  | ACTCTG   | TAGCAG   | TATCCT     | TGCGAA     | AGGCGAA   | AGGCAAA | CAGAAC | ACA     | CAGT   | :     | 208   |     |     |
| <i>NbSOBIR1-1</i> | :   | CCATGCA  | AATCTG   | TTGGA    | AATATC     | ATGTTGA    | ACGAC     | CACTCA  | CAAACA | ATTCA   | TATG   | :     | 216   |     |     |
|                   |     |          |          |          |            |            |           |         |        |         |        |       |       |     |     |
|                   | *   | 240      | *        | 260      | *          |            |           |         |        |         |        |       |       |     |     |
| <i>NbSOBIR1</i>   | :   | TGTTGAG  | AGTCA    | CCCGT    | ATTGACT    | TCAGAT     | CCAAT     | TGGAT   | TGAGT  | TGGA    | ACTTT  | TATC  | :     | 266 |     |
| <i>NtSOBIR1</i>   | :   | TGTTGAG  | AGTCA    | CCCGT    | ATTGACT    | TCAGAT     | CCAAT     | TGGAT   | TGAGT  | TGGA    | ACTTT  | TATC  | :     | 263 |     |
| <i>NbSOBIR1-1</i> | :   | TGCTT    | TAGAGT   | CACAG    | GGGTT      | TGTTT      | TCAAGT    | CCAT    | TGA    | ACTG    | AGGG   | CAACT | CTATC | :   | 271 |
|                   |     |          |          |          |            |            |           |         |        |         |        |       |       |     |     |
|                   | 280 | *        | 300      | *        | 320        | *          |           |         |        |         |        |       |       |     |     |
| <i>NbSOBIR1</i>   | :   | TCCTGCC  | ATTGG    | AAA      | ACTTT      | TCTGTG     | CTCAA     | AGA     | ACTT   | CTCT    | TCCAAA | CAAC  | CAA   | :   | 321 |
| <i>NtSOBIR1</i>   | :   | TCCTGCC  | ATTGG    | AAA      | ACTTT      | TCTGTG     | CTCAA     | AGA     | ACTT   | CTCT    | TCCAAA | CAAC  | CGA   | :   | 318 |
| <i>NbSOBIR1-1</i> | :   | TCCTGCC  | ATTG     | CAAG     | CTTT       | TCTGAG     | TCAA      | AAAA    | TGTT   | CCCT    | TACAAA | CAACA | AG    | :   | 326 |
|                   |     |          |          |          |            |            |           |         |        |         |        |       |       |     |     |
|                   | 340 | *        | 360      | *        | 380        |            |           |         |        |         |        |       |       |     |     |
| <i>NbSOBIR1</i>   | :   | CTCTTTG  | ACCAA    | ATCCC    | AGTTC      | CAGATT     | CTTGAT    | -TGCCG  | TAAA   | CTGG    | AGATT  | CTT   | :     | 375 |     |
| <i>NtSOBIR1</i>   | :   | CTCTTTG  | ACCAA    | ATCCC    | AGTTC      | CAGATT     | CTTGAC    | -TGCCG  | TAAA   | CTGG    | AGATT  | CTT   | :     | 372 |     |
| <i>NbSOBIR1-1</i> | :   | CTCTTTG  | ACAGAA   | TCCCA    | ACTCA      | AAATG      | TGAGG     | TGCCG   | TAAA   | CTGG    | AGATT  | CTT   | :     | 381 |     |
|                   |     |          |          |          |            |            |           |         |        |         |        |       |       |     |     |
|                   | *   | 400      | *        | 420      | *          | 440        |           |         |        |         |        |       |       |     |     |
| <i>NbSOBIR1</i>   | :   | GACCTT   | GGAACA   | AATCT    | GTTTT      | TCTGG      | GAAAG     | TTCAT   | CTG    | AATT    | TATCAT | CTCT  | TAC   | :   | 430 |
| <i>NtSOBIR1</i>   | :   | GACCTT   | GGAACA   | AATCT    | GTTTT      | TCTGG      | GAAAG     | TTCAT   | CTG    | AATT    | TATCAT | CTCT  | TAC   | :   | 427 |
| <i>NbSOBIR1-1</i> | :   | AACCTT   | CAAA     | CAACC    | AGTTTT     | TCTGG      | CAAAG     | TCCAT   | CTG    | AATT    | TATCAT | CTCT  | TAC   | :   | 436 |
|                   |     |          |          |          |            |            |           |         |        |         |        |       |       |     |     |
|                   | *   | 460      | *        | 480      | *          |            |           |         |        |         |        |       |       |     |     |
| <i>NbSOBIR1</i>   | :   | TCCGCCT  | TTGAA    | TCTTG    | AAT        | TCTTCA     | AATG      | AGTT    | TCT    | TGGG    | AATCT  | TAA   | CTT   | :   | 485 |
| <i>NtSOBIR1</i>   | :   | TCCGCCT  | TTGAA    | TCTTG    | AAT        | TCTTCA     | AATG      | AGTT    | TCT    | TGGG    | AATCT  | TAA   | CTT   | :   | 482 |
| <i>NbSOBIR1-1</i> | :   | TCCGCCT  | TTGAA    | TCTTG    | AAT        | TCTTCA     | AATG      | AGTT    | TCT    | TGGG    | AATCT  | TAA   | CTT   | :   | 491 |

500 \* 520 \* 540 \*  
*NbSOBIR1* : CTTGAAGTATTTTCCCAACTTAGAAAAACTCTCTTTAGCTGATAACATGTTCACT : 540  
*NtSOBIR1* : CTTGAAGTATTTTCCCAACTTAGAAAAACTCTCTTTAGCTGATAACATGTTCACT : 537  
*NbSOBIR1-1* : CTTGAAATACCTTTCCCAACCTTAGAAAACTCTCCCTTAGCTGATAACATGTTCACT : 546

560 \* 580 \* 600  
*NbSOBIR1* : GGAAAAATACCCCTTCTTTGAAATCTTTTAGGAATCTCCGTATCCTTAAATATTT : 595  
*NtSOBIR1* : GGAAAAATACCCCTTCTTTGAAATCTTTTAGGAATCTCCGTATCCTTAAATATTT : 592  
*NbSOBIR1-1* : GACAAAAATACCTCAATCCTTGAATCTTTTCAGAAATCTCCGGTTCCTCAACATTT : 601

\* 620 \* 640 \* 660  
*NbSOBIR1* : CAGGAAACAGTTTTCTTTGAAGGTCATGTGCCTGTTATGAGTCAAGTTGAGCACTT : 650  
*NtSOBIR1* : CAGGAAACAGTTTTCTTTGAAGGTCCTGTGCCTGTTATGAGTCAAGTTGAGCACTT : 647  
*NbSOBIR1-1* : CAGGGAATAGTTTTCTTTGAAGGTCGGTGCCTTTTCATGAGTCAAGTTAAGCACTT : 656

\* 680 \* 700 \*  
*NbSOBIR1* : GTCAGCAGAAATGGATCAGCAC---TTCGTTCCAAAACGTTACATTCTTGCTGAA : 702  
*NtSOBIR1* : GTCAGCAGAAATGGATCGGAACAACCTTCGTTCCAAAACGTTACATTCTTGCTGAA : 702  
*NbSOBIR1-1* : ATCAGCAGACTTGAATCGAAAAGATTATGTTCTTAAAACGTTACATTCTTGCTGAA : 711

720 \* 740 \* 760 \*  
*NbSOBIR1* : AATTCACAAGGTCAAATCAGATATCAGCACTGGCACCTAATTCCAATTCAGGAA : 757  
*NtSOBIR1* : AATTCGACAAGGTCAAATCAGATATCAGCACTGGCACCTAATTCCAATTCAGGAA : 757  
*NbSOBIR1-1* : AACTCAACAAGGTCAAAGTCAACAATCTGCAATGGCACCACTCCATTCAGGAA : 766

780 \* 800 \* 820  
*NbSOBIR1* : ATGCCCCAGCTCCAGCACCGAGTCATAATGTGCACTCCAATCCAAAACATAGTAA : 812  
*NtSOBIR1* : ATGCCCCAGCTCCAGCACCGAGTCATAATGTGCGCTCCAATCCAAAAGTAATAA : 812  
*NbSOBIR1-1* : ATGCCCCGGCTCCAGGACCCAGTGCAATGTGTAATACCAGTACACAAAACATACAA : 821

\* 840 \* 860 \* 880  
*NbSOBIR1* : CAGGAAGAAAAGGAAAGTCAGAGCGTGGTTACTTGGTTTCTTTGCTGGTTCTTTTC : 867  
*NtSOBIR1* : CAAGAAGAAAAGGAAAGTCAGAGCGTGGTTTCTTGGTTTCTTTGCTGGTTCTTTTC : 867  
*NbSOBIR1-1* : CACA---AAAAGAAGGTAAGCATATGGATTCTTGGATTCTGGCTGGATCTTTT : 873

\* 900 \* 920 \*  
*NbSOBIR1* : GCAGGAGCTATATCTGCAGTACTCTTATCAGTTCTTTTAAAGCTGGTCAATGTTT : 922  
*NtSOBIR1* : GCAGGAGCTATATCTGCAGTACTCTTATCAGTTCTCTTTAAAGCTGGTAAATGTTT : 922  
*NbSOBIR1-1* : GCAGGGATCTTATCTGC-GTGGTCTTATCCTTGTCTTTCAAGCTGGTATGATTA : 927



940                   \*                   960                   \*                   980                   \*  
*NbSOBIR1* : TTCTCCGAAAGGGAAAGACTGATGGAACTTTAACAATATACAGTCCACTGATTAA : 977  
*NtSOBIR1* : TCGTCCGAAAGGGAAAGACTGATGGAACTTTAACAATATACAGTCCACTGATTAA : 977  
*NbSOBIR1-1* : TCG---GAGGGAGCAAGGATGATTCAGGTATAACAATTTTTCAGTCCACTGATTAA : 979

                  1000                   \*                   1020                   \*                   1040  
*NbSOBIR1* : GAAAGCCGAGGATTTGGCCTTCTTAGAGACAGAAGATGGAGTAGCATCACTTGAA : 1032  
*NtSOBIR1* : GAAAGCCGAGGATTTGGCCTTCTTAGAGAAAGAAGATGGAGTAGCATCACTTGAA : 1032  
*NbSOBIR1-1* : GAAAGC----- : 985

                  \*                   1060                   \*                   1080                   \*                   1100  
*NbSOBIR1* : ATGATTGGAAAAGGTGGATCGGAGAAGTTTATAGAGCTGAGTTACCGGAAGTA : 1087  
*NtSOBIR1* : ATGATTGGAAAAGGTGGATCTGGAGAAGTTTATAGAGCTGAGTTACCGGAAGTA : 1087  
*NbSOBIR1-1* : -----AGAGTTACCGGAAGTA : 1002

                  \*                   1120                   \*                   1140                   \*  
*NbSOBIR1* : ATGGCAAGATTATAGCTATAAAGAAGATTTATCAACCCCAATGGATGCTGCAGA : 1142  
*NtSOBIR1* : ATGGCAAGATTATAGCTATAAAGAAGATTTATCAACCCCAATGGATGCTGCAGA : 1142  
*NbSOBIR1-1* : ATGGCAAGATTATAGCTATAAAGAAGATCGTAGAACCCCAAAGGATGCTGCAGA : 1057

                  1160                   \*                   1180                   \*                   1200                   \*  
*NbSOBIR1* : ACTCACCGAGGAAGATACCAAGGCTTTGAAACAATAAAAATGCGACAGTAAATCA : 1197  
*NtSOBIR1* : ACTCGCCGAGGAAGATACCAAGGCTTTGAAACAATAAAAATGCGACAGGTAATCA : 1197  
*NbSOBIR1-1* : ACTCACTGAGGAAGATAGCAAGGCTTTGAAATATATAAAAATGTCACACCAATCA : 1112

                  1220                   \*                   1240                   \*                   1260  
*NbSOBIR1* : GAAATTCAAATTCCTGGTCAAATCAGACACAGGAATCTGCTTCCCTACTGCGCAC : 1252  
*NtSOBIR1* : GAAATTCAAATTCCTGGTCAAATCAGACACAGGAATCTGCTTCCCTACTGCGCAC : 1252  
*NbSOBIR1-1* : GAAATTAAAATTGTAGGTCAAATAAGACACAGGAATCTGCTTCCCTCTAATAGCAC : 1167

                  \*                   1280                   \*                   1300                   \*                   1320  
*NbSOBIR1* : ATATGCCTAGGCCAGACTGCCATTACTTGGTATATGAAATATGAAAAATGGGAG : 1307  
*NtSOBIR1* : ATATGCCTAGGCCGACTGCCATTACTTGGTATATGAAATATGAAAAATGGGAG : 1307  
*NbSOBIR1-1* : ATATGCCAAGACCTGACTGCCATTACTTGGTCCGTGAGTACATGAAAAATGGGAG : 1222

                  \*                   1340                   \*                   1360                   \*  
*NbSOBIR1* : CTTACAAGATATCTCCAGCAAGTCACAGAGGGGACAGGGAAATAGATTGGTTG : 1362  
*NtSOBIR1* : CTTACAAGATATCTCCAGCAAGTCACAGAGGGGACAGGGAAATAGATTGGTTG : 1362  
*NbSOBIR1-1* : CTTACAGGATGCGCTCCAGCAAGTCACGGAGGGGACACGGGAAATAGATTGGTCC : 1277

                  1380                   \*                   1400                   \*                   1420                   \*  
*NbSOBIR1* : GCACGACACCGAATTGCAGTAGGGATAGCTTCTGGACTTGAGTATCTCATATTA : 1417  
*NtSOBIR1* : GCACGACACCGAATTGCAGTAGGGATAGCTACTGGACTTGAGTATCTCATATTA : 1417  
*NbSOBIR1-1* : GCACGTCATCGAATTGCAGTCCGGATCGCTGCTGGCTTGAGTATCTCATATTA : 1332

1440                   \*                   1460                   \*                   1480  
*NbSOBIR1* : ACCCACAGTCAATGCATAAATTCACAGAGATCTAAAGCCAGCAAATGTCCTTCTTGA : 1472  
*NtSOBIR1* : ACCCACAGTCAATGCATAAATTCACAGAGATCTAAAGCCAGCAAATGTCCTTCTTGA : 1472  
*NbSOBIR1-1* : ATCATAGTCAGCGTACAATTCACAGGATCTAAAGCCAGCAAATGTCCTTCTTG- : 1386

                 \*                   1500                   \*                   1520                   \*                   1540  
*NbSOBIR1* : CGATGATATGGAAGCTCGAATTGCTGATTTTGGACTTGC AAAAGCACTCCAGAT : 1527  
*NtSOBIR1* : CGATGATATGGAAGCTCGAATTGCTGATTTTGGACTTGC AAAAGCACTCCAGAT : 1527  
*NbSOBIR1-1* : -----CGAAA GCAATCCAGAA : 1403

                 \*                   1560                   \*                   1580                   \*  
*NbSOBIR1* : GCCCATACACATGTTACGACTTCAAATGTTGCAGGAACTGTGGGATAATTGCAC : 1582  
*NtSOBIR1* : GCCCATACACATGTTACGACTTCAAATGTTGCAGGAACTGTGGGATAATTGCAC : 1582  
*NbSOBIR1-1* : TCCCTTACGCTTTTCA--ACTTCAACCGTGGTAGGAACTTAGGATACATTGCAC : 1456

                 1600                   \*                   1620                   \*                   1640                   \*  
*NbSOBIR1* : CAGAATACCATCAGACACTGAAGTTTACCGGTAAGTGTGATATATACAGCTTTGG : 1637  
*NtSOBIR1* : CAGAATACCATCAGACACTGAAGTTTACCGGTAAGTGTGATATATACAGCTTTGG : 1637  
*NbSOBIR1-1* : CAGAATATTAC CAGACCGTTAAGTTTACAGATAAGTGTGATATATACAGCTTCCG : 1511

                 1660                   \*                   1680                   \*                   1700  
*NbSOBIR1* : TGTGGTGTGGCAGTGCTGTTTATAGGAAAACCTTCCATCAGATGAATTTTCCAG : 1692  
*NtSOBIR1* : TGTGGTGTGGCAGTGCTGTTTATAGGAAAAGCTTCCATCAGATGAATTTTCCAG : 1692  
*NbSOBIR1-1* : GATGCTGCTAGGCGTGCTAGTTATGGGAAAACCTTCCCTCTGATGAGCTCTTCCAG : 1566

                 \*                   1720                   \*                   1740                   \*                   1760  
*NbSOBIR1* : CACACGCTGAGATGAGTTTAGTGAAGTGGCTGAGAAAATGTAATGACTTCCGAGG : 1747  
*NtSOBIR1* : CACACGCTGAGATGAGTTTAGTGAAGTGGCTGAGAAAATGTAATGACTTCCGAGG : 1747  
*NbSOBIR1-1* : CCGGTTTTCTGGGATGGGTTTAGTGAATGGATGAGAAAATGTCACGACTTCCGAGA : 1621

                 \*                   1780                   \*                   1800                   \*  
*NbSOBIR1* : ATCCGAAAAGGGCAATTGATTCAAAGCTGATAGGAAATGGATTTGAGGAGCAAAA- : 1801  
*NtSOBIR1* : ATCCGAAAAGGGCAATTGATTCAAAGCTGATAGGAAATGGATTTGAGGAGCAAAA- : 1801  
*NbSOBIR1-1* : ATCCAAAAAGAGCAATTGATTCAAAGCTGATGGGTAATGGGTTATGAGGAGCAAAA : 1676

                 1820                   \*                   1840                   \*                   1860                   \*  
*NbSOBIR1* : TGCTTTTGGTTCTCAAGATAGCCTTGCTTTTGTACTCTGGAATAATCAAAGGAGAG : 1856  
*NtSOBIR1* : TGCTTTTGGTTCTCAAGATAGCCTTGCTTTTGTACTCTGGAATAATCAAAGGAGAG : 1856  
*NbSOBIR1-1* : TGCTTTTGGTTCTCAAGATAGCCTTGCTTTTGTACTCTGGAATAATCAAAGGAGAG : 1731

```

                1880          *          1900          *          1920
NbSOBIR1 : GCCTAACAGTAAGGATGTTAGGTTGTTATGTTAACTCAGATCAAGCACTTAAG----- : 1905
NtSOBIR1 : GCCTAACAGTAAGGATGTTAGGTTGTTATGTTAACTCAGATCAAGCACTTA----- : 1904
NbSOBIR1-1 : GCCTAACAGTAAGGATGTTAGATGTCATGTTAACTCAGATCAAGCCTCAAGTAGGT : 1786

```

```

                *
NbSOBIR1 : ----- : -
NtSOBIR1 : ----- : -
NbSOBIR1-1 : AGAGGATAA : 1795

```
